# Supplementary material
Source: HighWire-hosted journal article supplement (https://www.jneurosci.org/content/37/36/8706)
Supplement: inline-supplementary-material-7 [file inline-supplementary-material-7.xlsx]

## Sheet: Sheet 1
Figure 2-1
Genes that are differentially expressed in astrocytes between Cortex and Hypothalamus
Gene symbol	Ctx FPKM	log2 (ctx FPKM)	Hypo FPKM	log2 (hypo FPKM)
Sparc	126.583	6.98394	1815.51	10.8262
Agt	16.252	4.02255	207.473	7.69678
Apoc1	17.5365	4.13229	138.281	7.11146
Slc6a9	8.86905	3.14878	76.6713	6.26061
Heyl	6.217	2.63622	58.6805	5.87481
Prkcd	3.70982	1.89135	53.1541	5.73211
Mfge8	138.751	7.11635	36.037	5.17141
Ntng1	5.23766	2.38892	30.5347	4.93238
Gstt3	4.8629	2.28182	26.2826	4.71604
Bbox1	2.37	1.24489	25.8961	4.69466
Spon1	5.14441	2.36301	24.6139	4.6214
Ucp2	2.77771	1.4739	21.8487	4.44948
A330076C08Rik	0.578278	-0.790165	20.1272	4.33107
Igsf1	0.747369	-0.420107	19.3423	4.27369
Lhx2	119.475	6.90056	11.4706	3.51987
Adcy8	1.97805	0.984079	10.3692	3.37423
Gm5741	0	0	5.01846	2.32724
Nupr1	60.3545	5.91539	4.3485	2.12052
Galnt10	0.201402	-2.31185	3.11268	1.63816
Naaa	11.9431	3.57811	2.51986	1.33334
Car8	19.0824	4.25417	2.40603	1.26665
Emx2	18.9446	4.24371	2.06871	1.04873
B230323A14Rik	0	0	1.33757	0.419614
Thbs4	11.4318	3.51498	0.504034	-0.988407
Chrdl1	14.7791	3.88549	0.356923	-1.48632
Tfcp2l1	2.2837	1.19137	0.312925	-1.67611
